# Supplementary material for: Light-Up of Rhodamine Hydrazide to Generate Emissive Initiator for Polymerization and to Afford Photochromic Polypeptide Metal Complex
Source: MDPI journal article supplement (doi:10.3390/polym9090419), 2017-09-05
Supplement: s1 [file s1]

**Light-up of rhodamine hydrazide to generate emissive initiator for  
polymerization and to afford photochromic polypeptide metal  
complex**

Jhen-Yan Gao, Wen-Chih Huang, Pei-Yi Huang, Cheng-Yu Song and Jin-Long

Hong\*

Department of Materials and Optoelectronic Science, National Sun Yat-Sen  
University, Kaohsiung 80424, Taiwan

## Experimental section

### Materials

DMF (Aldrich) was refluxed and distilled over  $\text{CaH}_2$  (Aldrich) under reduced pressure to a flask containing alumina before use. Rhodamine 6G (Acros, 99%) and hydrazine monohydrate (Aldrich, 80%) were used without further purification.  $\gamma$ -Propargyl-L-glutamate N-carboxyanhydride (PLG-NCA) were prepared according to the reported procedures [s1]. Preparation procedures of R-C and R-PLG were illustrated in Scheme S1 and detailed as below:

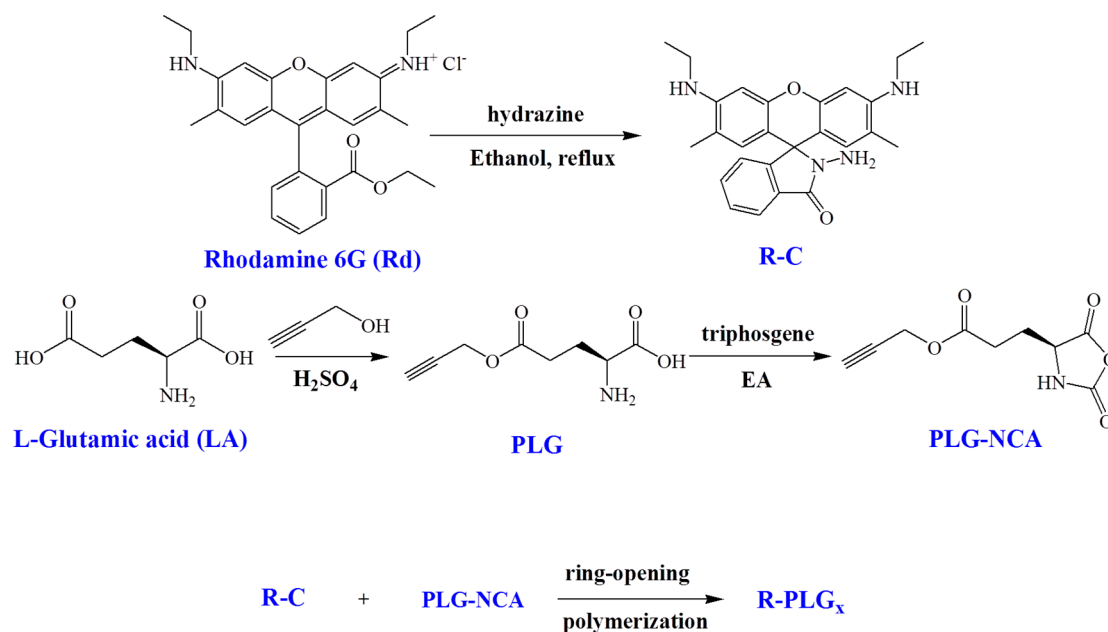

**Scheme S1.** Syntheses of R-C and PLG-NCA and the following ring-opening polymerization of PLG-NCA monomer initiated by R-C to obtain R-PLG<sub>x</sub>.

### ***Preparations of Rhodamine hydrazide (R-C).***

R-C was synthesized by using the method previously described [s2,s3]. To a vigorously-stirred solution of rhodamine 6G (2 g, 4 mmol) in ethanol (65 mL), hydrazine monohydrate (6.3 mL, 110 mmol) was added dropwise at room temperature. The mixture was then heated under reflux for 2 h. After cooling to room temperature, the mixture solution was filtered and the solid filtrate was thoroughly washed with ethanol–water (1 : 2) to provide R-C as a pink solid (yield 1.51 g, 87%). <sup>1</sup>H NMR (300 MHz; *d*<sub>6</sub>-DMSO): δ 1.21 (6H, t, CH<sub>3</sub>), 1.87 (6H, s, CH<sub>2</sub>CH<sub>3</sub>), 3.10–3.16 (4H, m, NCH<sub>2</sub>), 4.21 (2H, s, NH<sub>2</sub>), 4.99 (2H, t, *J* = 5.44 Hz, NH), 6.10 (2H, s, ArH), 6.27 (2H, s, ArH), 6.92–6.94 (1H, m, CH), 7.44–7.48 (2H, m, ArH), 7.74–7.77 (1H, m, ArH). (Figure S1)

### ***Ring-opening polymerization of N-carboxyanhydride to prepare R-PLG<sub>13</sub> and R-PLG<sub>23</sub>***

Solution of PLG-NCA (3 g, 14.2 mmol) in anhydrous DMF (20 mL) was stirred and bubbled with argon for 20 min before adding solution of R-C (0.20 g (0.47 mmol) for R-PLG<sub>13</sub> and 0.086 g (0.2 mmol) for R-PLG<sub>23</sub> in anhydrous DMF (5 mL). The reaction mixture was stirred for 2 days at room temperature and the resulting polymer was precipitated from diethyl ether, and dried in vacuum oven. <sup>1</sup>H NMR (500 MHz, CD<sub>2</sub>Cl<sub>2</sub>): δ 8.34 (broad, 1H, H<sub>f</sub>), 6.1-7.63 (broad, 8H, H<sub>h</sub>, H<sub>i</sub>), 4.68 (s, 2H, H<sub>b</sub>), 3.98 (broad, 1H, H<sub>e</sub>), 3.5, 3.2 (2H, H<sub>j</sub>), 2.72 (broad, 2H, H<sub>c</sub>), 2 - 2.8 (m, H<sub>a,c,d,k,l</sub>), 1.25 (4H, H<sub>g</sub>) (Figure 3). <sup>13</sup>CNMR (125 MHz, CD<sub>2</sub>Cl<sub>2</sub>): δ 177.2 (C<sub>f</sub>), 173.0 (C<sub>h</sub>), 163 (C<sub>e</sub>), 132-128 (C<sub>5</sub>), 96-94 (C<sub>4</sub>), 79.3 (C<sub>g</sub>), 76.0 (C<sub>a</sub>), 57.5 (C<sub>b</sub>), 52.9 (C<sub>e</sub>), 41.0 (C<sub>3</sub>), 31.9 (C<sub>c</sub>), 26.4 (C<sub>d</sub>), 19.0 (C<sub>2</sub>), 16.0 (C<sub>1</sub>) (Figure S2).

### **Measurements**

$^1\text{H}$  NMR spectra were recorded at room temperature using a Bruker AM 500 (500 MHz) spectrometer with tetramethylsilane (TMS) as external standard. To ensure thorough dissolution of the polymers to afford clearly-resolved resonance peaks, one drop of trifluoroacetic acid (TFA) was added to sample solution in  $\text{CD}_2\text{Cl}_2$ .  $^{13}\text{C}$  CP-MAS NMR spectra were acquired on a Bruker 14.1 T wide-bore Avance III spectrometer equipped with a 4 mm double-resonance magic-angle-spinning (MAS) probe head. The Larmor frequency used for  $^{13}\text{C}$  NMR was 150.92 MHz and the samples were spun at 12 kHz. The molecular weights (MW) of R-PLG<sub>23</sub> and R-PLG<sub>13</sub> were determined by a Bruker Autoflex III Maldi-Tof mass spectrometer. The *trans*-2-[3-(4-*tert*-Butylphenyl)-2-methyl-2-propenylidene]malononitrile (DCTB) containing 1 wt% sodium and potassium salts was used as matrix material. Sample was mixed with the matrix in a weight ratio of 1/10 in acetonitrile to induce crystalline material for analysis. The sample spot was irradiated with a Nd: YAG laser (355 nm; pulse duration, 3 ns; 200 Hz) for desorption and ionization. In total, 1400 laser shots are averaged for each sample analysis to obtain representative mass spectra. Infrared spectra were recorded using a Bruker Tensor 27 Fourier-transform infrared (FTIR) spectrophotometer; 32 scans were collected at a spectral resolution of  $1\text{ cm}^{-1}$ . The solid polymer powders were homogeneously blended with KBr before being pressed to make pellets for measurements. The UV absorption spectra were recorded with a JASCO V-770 spectrophotometer. The PL emission spectra were obtained from a LabGuide X350 fluorescence spectrophotometer using a 450 W Xe lamp as the continuous light source. A small quartz cell with dimensions  $0.2 \times 1.0 \times 4.5\text{ cm}^3$  was used to accommodate the solution sample. A “right angle” geometry was employed such that fluorescence was collected at a right angle to the excitation beam used in the spectral measurement. Circular dichroism (CD) spectra were recorded using a JASCO J-810-150S (Japan) spectropolarimeter equipped with a Jascow32 Spectral Manager program. Polymer

solutions with constant concentration of  $10^{-4}$  M were used for measurement. The spectra were also curve-fitted using the Jascow32 Spectra Manager program to resolve the fraction of the individual secondary structure. The dimension of the aggregate particles was determined using a dynamic light scattering (DLS) instrument on a Malvern ZetaSizer Nano ZS90 spectrometer. A He –Ne laser operating at 633 nm was used as the light source.

## References

- [s1] Y. C. Lin and S. W. Kuo, *Polym. Chem.* **2012**, 3, 162.
- [s2] S. Kang, S. Kim, Y. K. Yang, S. Bae, J. Tae, *Tetrahedron Letters* **2009**, 50, 2010.
- [s3] J. Madsen, N. J. Warren, S. P. Ames. *Biomaterials* **2011**, 12, 2225.

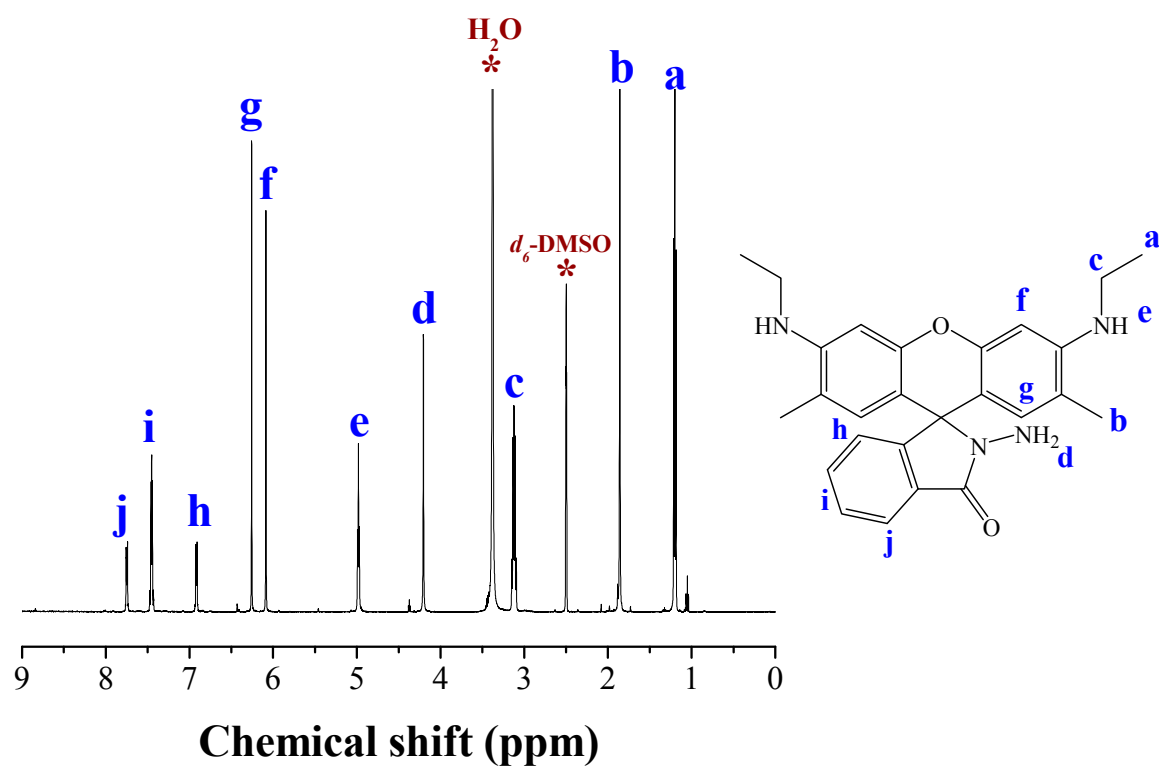

**Figure S1.**  $^1\text{H}$  NMR spectra of R-C (in  $d_6$ -DMSO).

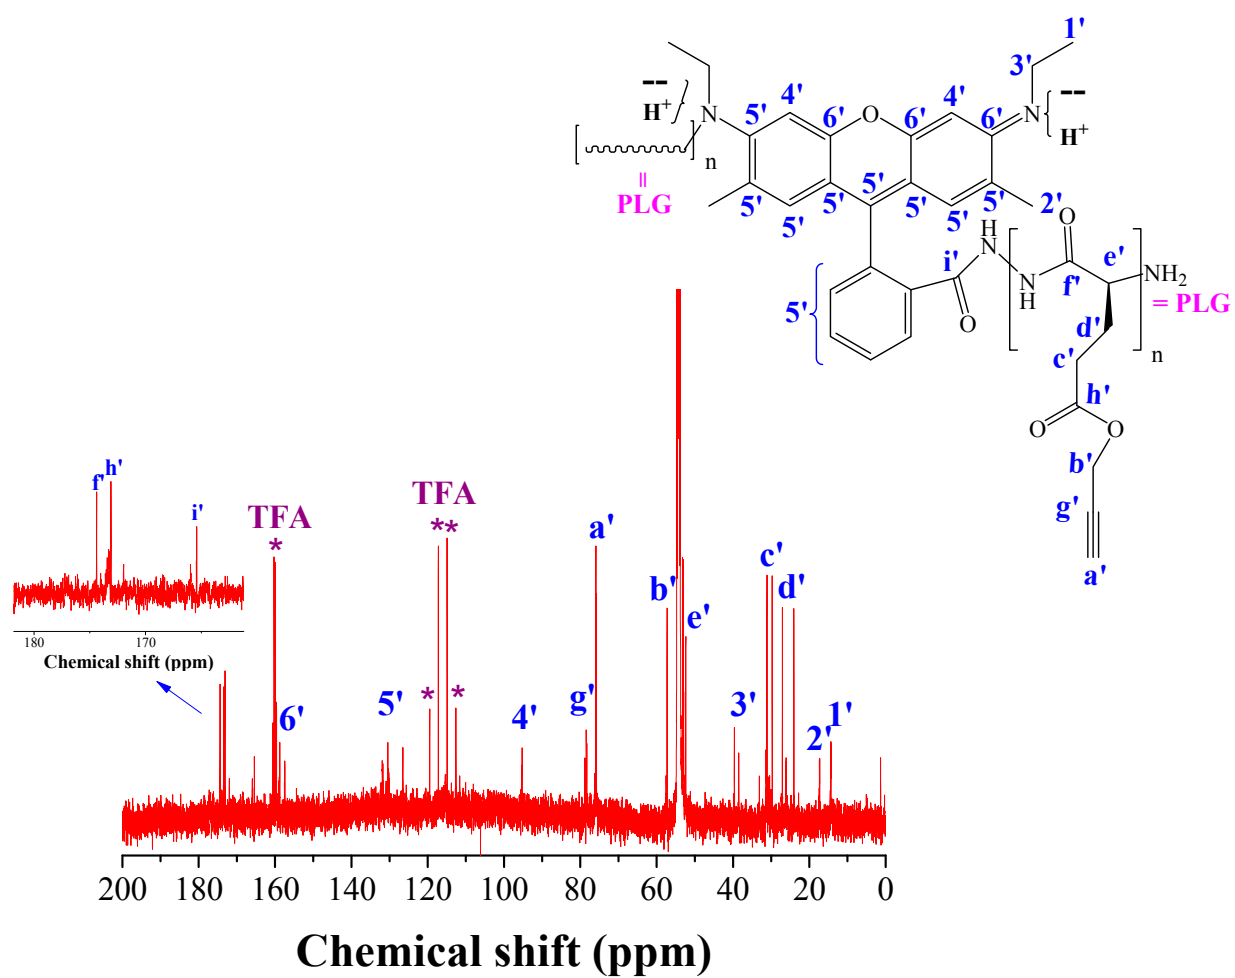

**Figure S2**  $^{13}\text{C}$  NMR spectra of R-PPLG<sub>13</sub> in  $\text{CD}_2\text{Cl}_2/\text{TFA}(\text{trace})$ .

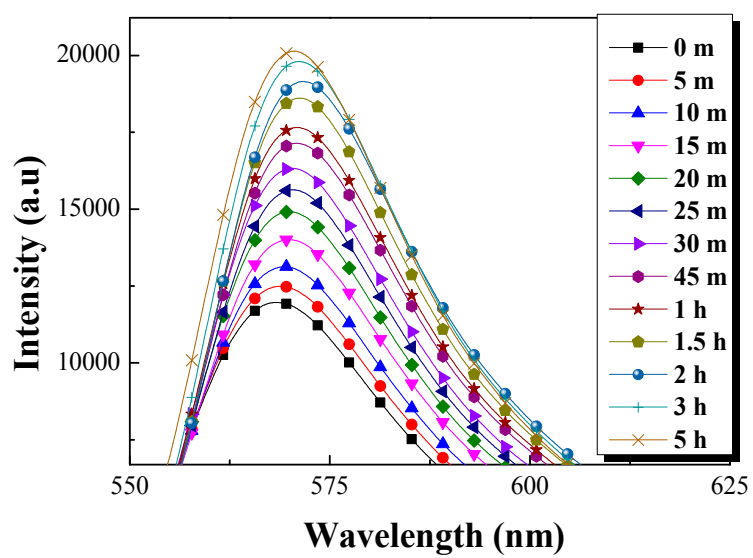

**Figure S3.** Variations of emission spectra of R-C/PLG-NCA ( $[R-C] = 5 \times 10^{-3} \text{ M}$ ,  $[PLG-NCA] = 5 \times 10^{-1} \text{ M}$ ) mixture solution in DMF over time. ( $\lambda_{\text{ex}} = 490 \text{ nm}$ )



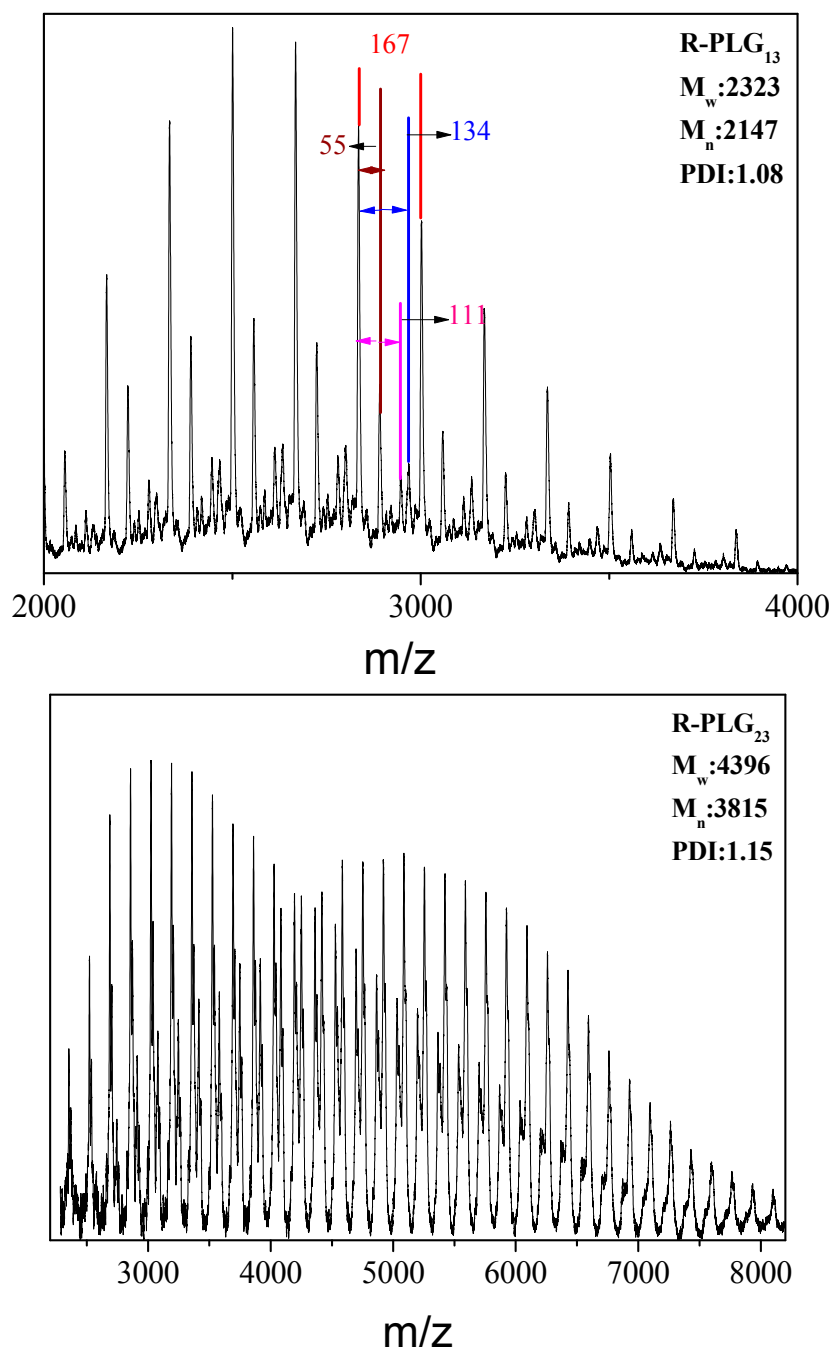

**Figure S4.** Madi-Tof mass spectra of R-PLG<sub>13</sub> and R-PLG<sub>23</sub>.

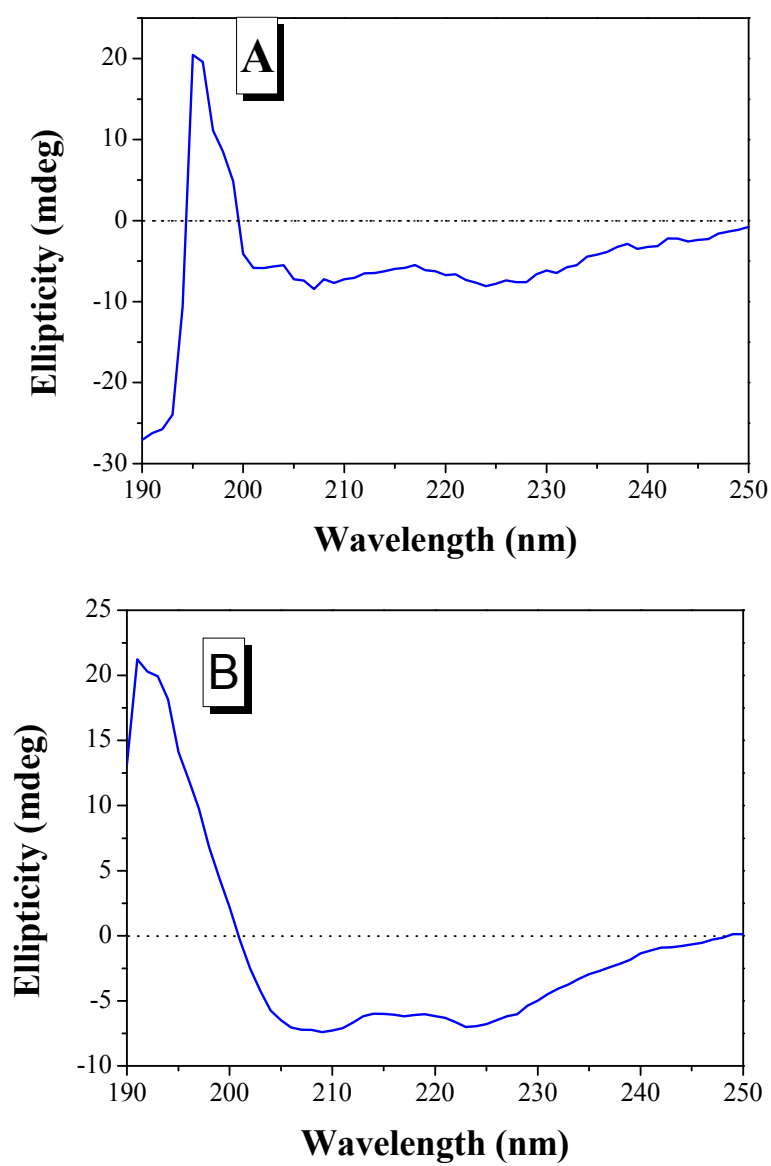

**Figure S5.** CD spectra of (a) R-PLG<sub>13</sub> and (b) R-PLG<sub>23</sub> in methanol.

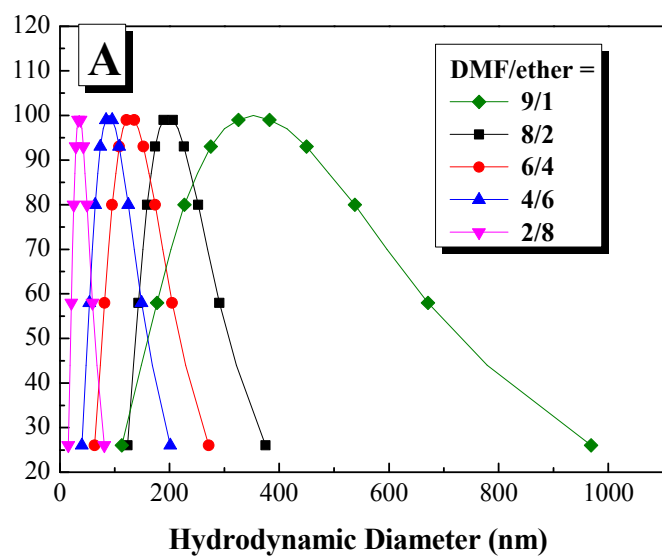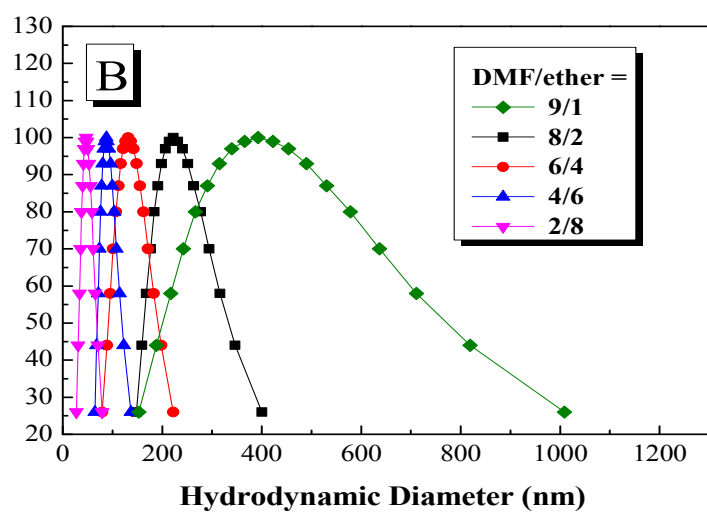

**Figure S6.** Particle sizes of (a) R-PLG<sub>23</sub> ( $10^{-4}$  M) and (b) R-PLG<sub>13</sub> ( $10^{-4}$  M) in solution mixtures of DMF/ether of different compositions.

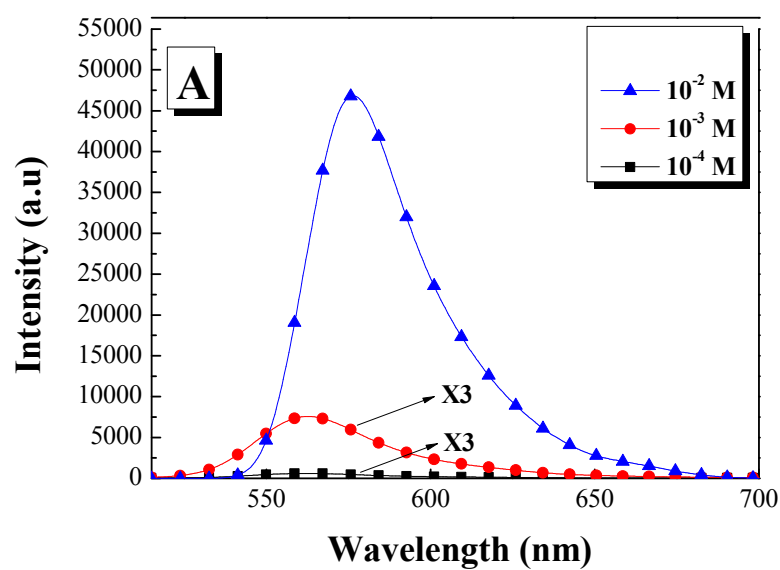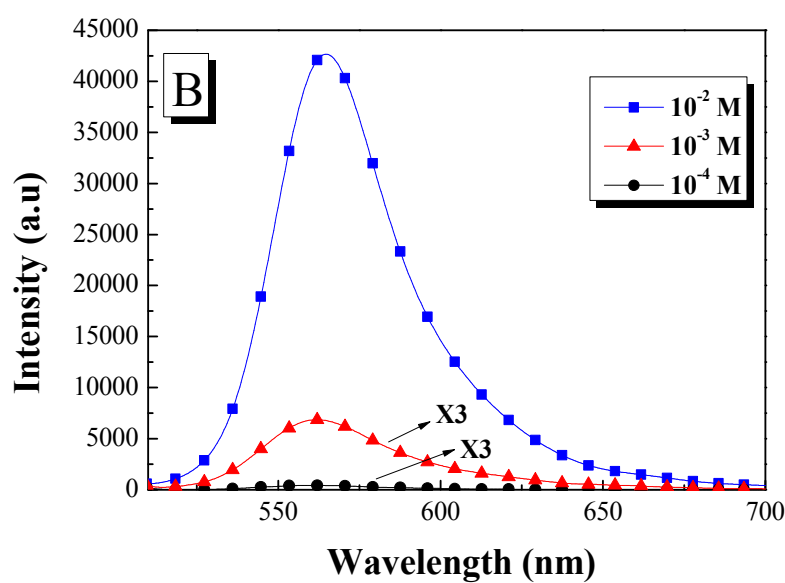

**Figure S7.** Emission spectra of (A) R-PLG<sub>23</sub> ( $10^{-4}$  M) and (B) R-PLG<sub>13</sub> ( $10^{-4}$  M) solutions in DMF of different concentrations ( $\lambda_{\text{ex}} = 490$  nm).

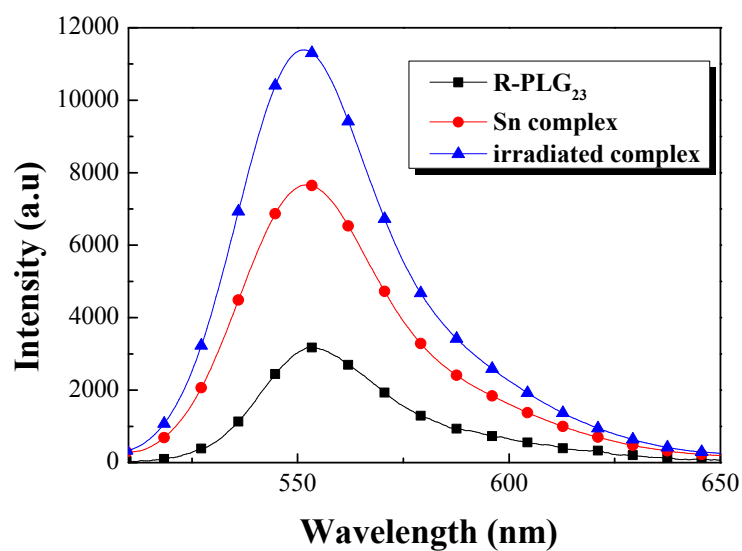

**Figure S8.** Solution emission spectra of R-PLG<sub>23</sub>, Sn(II) metal complex and the complex solution upon UV irradiation ( $[R-PLG_{23}] = 10^{-4}$  M,  $[SnCl_2] = 10^{-3}$  M in THF,  $\lambda_{ex} = 490$  nm)

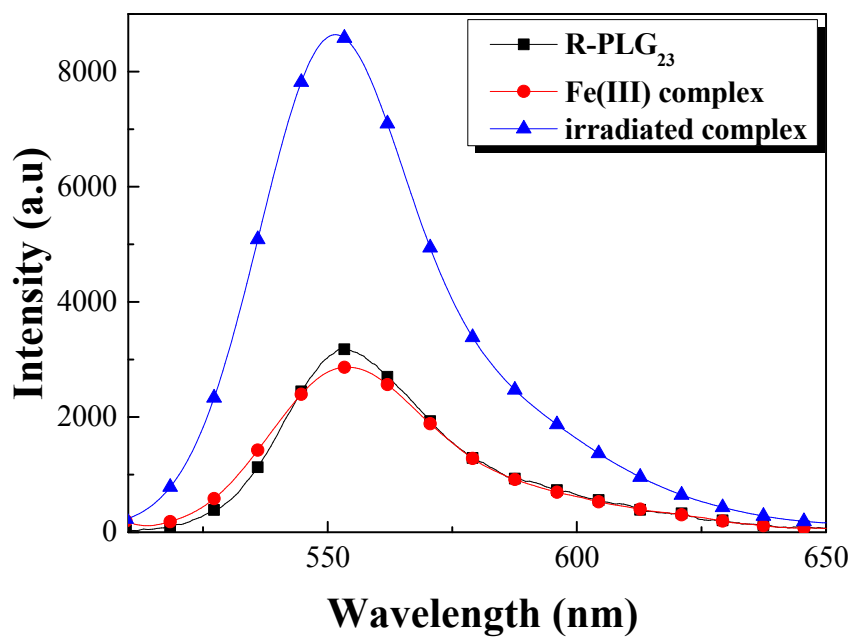

**Figure S9.** Solution emission spectra of R-PLG<sub>23</sub>, Fe(III) metal complex and the complex solution upon UV irradiation ( $[R-PLG_{23}] = 10^{-4}$  M,  $[FeCl_3] = 10^{-3}$  M in THF,  $\lambda_{ex} = 490$  nm)
